# Supplementary material
Source: Springer Nature journal article supplement (https://www.springermedizin.de/resource/supplementary/12914_2008_60_MOESM1_ESM.pdf/9537488)

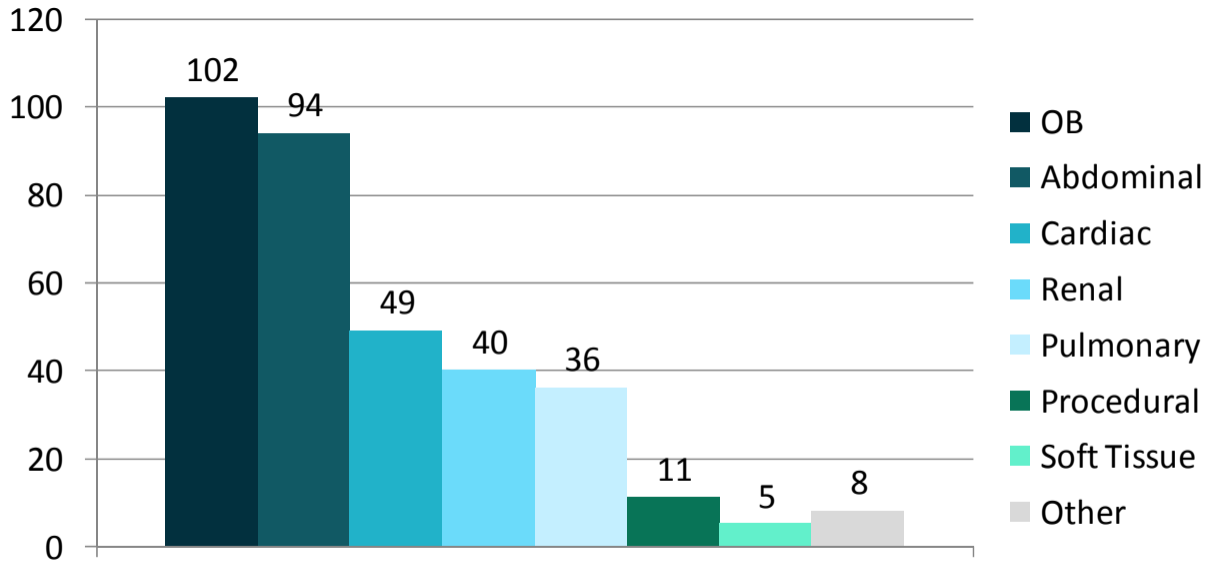

Total Ultrasound Scans= 345

Supplement: MOESM1 [file 9537488]
